# Supplementary material for: lncRNA-PCAT1 rs2632159 polymorphism could be a biomarker for colorectal cancer susceptibility
Source: PubMed Central journal article supplement (PMC6629943; doi:10.1042/bsr20190708), 2019-07-12
Supplement: bsr20190708_Supp1.pdf [file bsr20190708_Supp1.pdf]

# <Supplementary Materials>

## **lncRNA-*PCAT1* rs2632159 polymorphism could be a biomarker for colorectal cancer susceptibility**

### **Short title: *PCAT1* SNP for CRC risk**

Ming-li Yang<sup>1</sup>, Zhe Huang<sup>2</sup>, Li-na Wu<sup>1</sup>, Rong Wu<sup>1</sup>, Han-xi Ding<sup>3</sup>, Ben-gang Wang<sup>4,\*</sup>

<sup>1</sup> The 2nd Oncology Department of Affiliated Shengjing Hospital of China Medical University, Shenyang 110022, China

<sup>2</sup> Genery Surgery Department of Affiliated Shengjing Hospital of China Medical University, Shenyang 110015, China

<sup>3</sup> Tumor Etiology and Screening Department of Cancer Institute and General Surgery, the First Affiliated Hospital of China Medical University, Shenyang 110001, China

<sup>4</sup> Department 1 of General Surgery, the First Hospital of China Medical University, Shenyang 110001, China

**\*Corresponding author:** Dr. Ben-gang Wang, Department 1 of General Surgery, the First Hospital of China Medical University, North Nanjing Street 155#, Heping District, Shenyang 110001, China. Telephone: +86-024-83283308; fax: +86-024-83282383. Email: [bgwang@cmu.edu.cn](mailto:bgwang@cmu.edu.cn).

### <Contents>

Supplementary Table 1. The captured SNPs covered by the selected tagSNPs

Supplementary Table 2. The baseline of the subjects

Supplementary Figure 1. The linkage disequilibrium (LD) of *PCAT1* gene

Supplementary Table 1. The captured SNPs covered by the selected tagSNPs

| TagSNPs   | Captured SNPs                                                                                                                                                                                                  |
|-----------|----------------------------------------------------------------------------------------------------------------------------------------------------------------------------------------------------------------|
| rs4573233 | rs10481163,rs17762938,rs4473999,rs1551515,rs2124597,rs10481164,rs73351641,rs7824393,rs7823764,rs6651240,rs16901904,rs7842175,rs10109680,rs1551513,rs9656964,rs7823297,rs7824011,rs7463326,rs17762878,rs4573233 |
| rs710885  | rs785004,rs2632160,rs785003,rs710885,rs785002                                                                                                                                                                  |
| rs1902432 | rs1026411,rs1902432,rs1551514,rs2015595                                                                                                                                                                        |
| rs785005  | rs785005,rs2676456,rs2606181                                                                                                                                                                                   |
| rs2632159 | rs2632159,rs931354                                                                                                                                                                                             |

Supplementary Table 2. The baseline of the subjects

| Variables | <i>P</i> | CRC         |              |              |                  |                   |
|-----------|----------|-------------|--------------|--------------|------------------|-------------------|
|           |          | CRC vs. CON | CON (%)      | All (%)      | Colon Cancer (%) | Rectal Cancer (%) |
|           |          |             | <b>n=510</b> | <b>n=436</b> | <b>n=229</b>     | <b>n=207</b>      |
| Gender    |          |             |              |              |                  |                   |
| Male      |          |             | 234(45.9)    | 252(57.8)    | 120(52.4)        | 132(63.8)         |
| Female    | <0.001   |             | 276(54.1)    | 184(42.2)    | 109(47.6)        | 75(36.2)          |
| Age       |          |             |              |              |                  |                   |
| Mean±SD   |          |             | 49.9±15.0    | 59.6±10.2    | 59.9±10.8        | 59.2±9.54         |
| Median    |          |             | 49           | 60           | 61               | 60                |
| Range     | <0.001   |             | 23-90        | 22-82        | 24-82            | 22-78             |

Note: CON, controls; CRC, colorectal cancer.
